# Supplementary material for: Effect of Long-Term Stockpiling on Oxidation and Flotation Response of Low-Grade Copper Sulphide Ore
Source: MDPI journal article supplement (doi:10.3390/min13020269), 2023-02-14
Supplement: s1 [file s1]

# Supplementary Material: Effect of Long-Term Stockpiling on Oxidation and Flotation Response of Low-Grade Copper Sulphide Ore

Aline Cristina Tavares, Marisa Bezerra de Mello Monte and Luís Marcelo Tavares \*

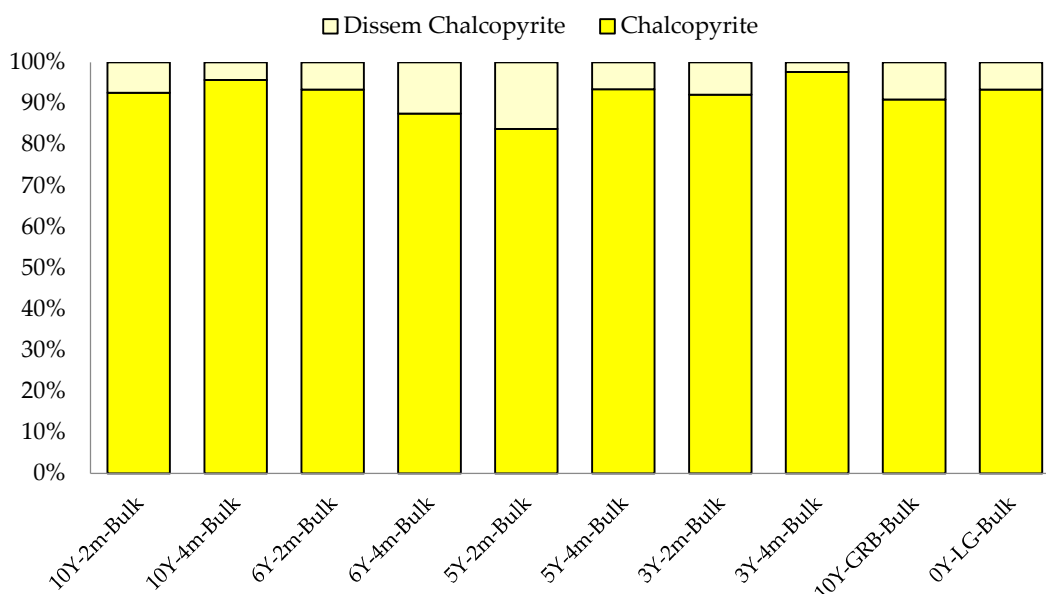

Figure S1. Copper department (wt.%) of the bulk samples.

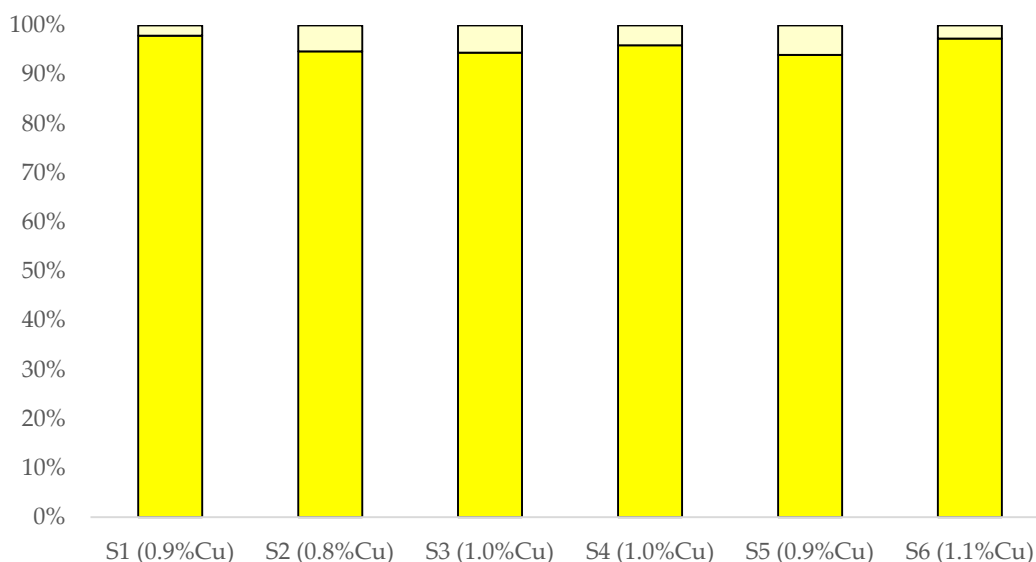

Figure S2. Copper department (wt.%) of six flotation feed samples.

**Table S1.** Chemical formulas of minerals cited identified in the copper ore.

| Mineral      | Acronym | Formula                                                                                                                                                                                                                                                    |
|--------------|---------|------------------------------------------------------------------------------------------------------------------------------------------------------------------------------------------------------------------------------------------------------------|
| Amphiboles   | apl     | Inosilicate minerals, forming prism or needlelike crystals, composed of double chain $\text{SiO}_4$ tetrahedra, linked at the vertices and generally containing iron and/or magnesium in their structures                                                  |
| Apatite      | ap      | $\text{Ca}_{10}(\text{PO}_4)_6(\text{OH}, \text{F}, \text{Cl})_2$                                                                                                                                                                                          |
| Biotite      | bt      | $\text{K}(\text{Mg}, \text{Fe})_3\text{AlSi}_3\text{O}_{10}(\text{F}, \text{OH})_2$                                                                                                                                                                        |
| Carbonates   | cb      | Minerals containing the carbonate ion, $\text{CO}_3^{2-}$                                                                                                                                                                                                  |
| Chalcocite   | cc      | $\text{Cu}_2\text{S}$                                                                                                                                                                                                                                      |
| Chalcopyrite | ccp     | $\text{CuFeS}_2$                                                                                                                                                                                                                                           |
| Chlorite     | chl     | $(\text{Mg}, \text{Fe})_3(\text{Si}, \text{Al})_4\text{O}_{10}(\text{OH})_2 \cdot (\text{Mg}, \text{Fe})_3(\text{OH})_6$                                                                                                                                   |
| Epidote      | ep      | $\text{Ca}_2\text{Al}_2(\text{Fe}^{3+}, \text{Al})(\text{SiO}_4)(\text{Si}_2\text{O}_7)\text{O}(\text{OH})$                                                                                                                                                |
| Fluorite     | flr     | $\text{CaF}_2$                                                                                                                                                                                                                                             |
| Feldspar     | fsp     | Aluminosilicate minerals with general formula $\text{XY}_4\text{O}_8$ in which X = potassium, sodium, or calcium (Ca); and Y = silicon (Si) and aluminum (Al), with a Si:Al ratio ranging from 3:1 to 1:1                                                  |
| Garnet       | grn     | Nesosilicates with general formula $\text{X}_3\text{Y}_2(\text{SiO}_4)_3$ in which X = divalent cations (Ca, Mg, Fe, Mn) and Y = trivalent cations (Al, Fe, Cr) in an octahedral/tetrahedral framework with $[\text{SiO}_4]^{4-}$ occupying the tetrahedra |
| Magnetite    | mg      | $\text{Fe}_3\text{O}_4$                                                                                                                                                                                                                                    |
| Pyrite       | py      | $\text{FeS}_2$                                                                                                                                                                                                                                             |
| Quartz       | qz      | $\text{SiO}_2$                                                                                                                                                                                                                                             |
| Scapolite    | sc      | Silicates composed of aluminium, calcium, and sodium silicate with chlorine, carbonate and sulfate                                                                                                                                                         |

**Table S2.** First regression model found to estimate copper recovery in the rougher stage.

| Equation Number | Size Fraction (mm) | Equation                                |
|-----------------|--------------------|-----------------------------------------|
| (1)             | 150 × 100          | Cu Recovery (%) = 88.07 + 8.00 × Cu (%) |
| (2)             | 100 × 76.2         | Cu Recovery (%) = 88.13 + 8.00 × Cu (%) |
| (3)             | 76.2 × 50          | Cu Recovery (%) = 89.21 + 8.00 × Cu (%) |
| (4)             | 50 × 25            | Cu Recovery (%) = 89.44 + 8.00 × Cu (%) |
| (5)             | 25 × 12.5          | Cu Recovery (%) = 87.82 + 8.00 × Cu (%) |
| (6)             | 12.5 × 6.3         | Cu Recovery (%) = 87.74 + 8.00 × Cu (%) |
| (7)             | 6.3 × 3.35         | Cu Recovery (%) = 82.54 + 8.00 × Cu (%) |
| (8)             | 3.35 × 1           | Cu Recovery (%) = 77.48 + 8.00 × Cu (%) |
| (9)             | 1 × 0              | Cu Recovery (%) = 47.43 + 8.00 × Cu (%) |

**Table S3.** Run of mine particle size distribution to estimate Cu recovery in the rougher stage.

| <b>Size (mm)</b> | <b>Cumulative Passing<br/>(wt.%)</b> | <b>Retained (wt.%)</b> | <b>Cu Grade (wt.%)</b> | <b>Cu Recovery (wt.%)<br/>Predicted</b> |
|------------------|--------------------------------------|------------------------|------------------------|-----------------------------------------|
| 1910             | 100.00                               | 0.00                   | 0.34                   | 91.2                                    |
| 1270             | 99.22                                | 0.78                   | 0.34                   | 91.2                                    |
| 640              | 86.57                                | 12.65                  | 0.34                   | 91.2                                    |
| 380              | 65.34                                | 21.23                  | 0.34                   | 91.2                                    |
| 250              | 47.77                                | 17.57                  | 0.34                   | 91.2                                    |
| 200              | 39.99                                | 7.78                   | 0.34                   | 91.2                                    |
| 150              | 31.85                                | 8.14                   | 0.34                   | 91.2                                    |
| 100              | 23.02                                | 8.83                   | 0.34                   | 91.2                                    |
| 50               | 13.27                                | 9.75                   | 0.34                   | 91.2                                    |
| 25               | 7.68                                 | 5.59                   | 0.34                   | 91.2                                    |
| 20               | 6.13                                 | 1.55                   | 0.34                   | 91.2                                    |
| 10               | 4.46                                 | 1.67                   | 0.34                   | 91.2                                    |
| 8                | 3.56                                 | 0.90                   | 0.34                   | 91.2                                    |
| 6                | 2.60                                 | 0.96                   | 0.34                   | 91.2                                    |
| 4                | 2.08                                 | 0.52                   | 0.34                   | 84.8                                    |
| 2                | 1.07                                 | 1.01                   | 0.34                   | 84.8                                    |
| <2               |                                      | 1.07                   | 0.34                   | 50.1                                    |
| <b>TOTAL</b>     |                                      | <b>100.00</b>          | <b>0.34</b>            | <b>90.7</b>                             |
